# Vector manipulation by a semi-persistent plant virus through disease symptom expression

---

Diego F. Vasquez<sup>1,2</sup>, Felipe Borrero-Echeverry<sup>2\*</sup>, Diego F. Rincon<sup>2</sup>

<sup>1</sup> Universidad Nacional de Colombia- Sede Bogotá. Cra 45 #2685, Bogotá

<sup>2</sup> Corporación Colombiana de Investigación Agropecuaria – AGROSAVIA. Centro de Investigación Tibaitatá, Km 14 vía Mosquera-Bogotá, Mosquera, Colombia

\* Corresponding Author

Email addresses: [dfvasquezm@unal.edu.co](mailto:dfvasquezm@unal.edu.co) (DFV), [drincon@agrosavia.co](mailto:drincon@agrosavia.co) (DFR),  
[fborrero@agrosavia.co](mailto:fborrero@agrosavia.co) (FB-E)

## 1 **Abstract**

2 The greenhouse whitefly (GWF), *Trialeurodes vaporariorum* (Westwood) (Hemiptera:  
3 Aleyrodidae) is rarely associated with potato plants yet is the only known vector of the  
4 *Potato yellow vein virus* (PYVV). A host shift related with vector's cognition often requires  
5 neural alterations by the virus. However, PYVV, being semi-persistent, is not supposed to  
6 directly affect vector physiology. As such, we propose that changes in potato plants caused  
7 by PYVV infection should manipulate insect behaviour to increase transmission. Here, we  
8 studied the effect of PYVV infection and symptom expression on GWF biological  
9 parameters, and attraction towards infected and uninfected potato plants. We compared  
10 survival and development rates of GWF nymphs fed with PYVV-infected plants  
11 (symptomatic and asymptomatic) and healthy plants under controlled conditions. We also  
12 carried out free-choice tests to determine host preference of GWF adults as a function of  
13 PYVV infection and disease symptom expression. We found that PYVV infection (both  
14 symptomatic and asymptomatic) reduce GWF survival while increasing development time  
15 (in symptomatic plants). Combined, a prolonged development time and reduced survival  
16 should favour viral uptake and trigger migration of vectors from symptomatic plants short  
17 after acquiring the virus. We also found that symptom expression (yellowing) causes  
18 significantly greater GWF attraction and establishment compared to healthy or  
19 asymptomatic plants. Interestingly, we found that GWF adults that have previously fed on  
20 infected plants switch their host preference choosing and establishing on healthy potato  
21 plants, which clearly increases horizontal transmission rates. The mechanism through  
22 which this behavioural manipulation takes place is not yet well understood. Our results  
23 show that symptoms associated with PYVV infection may account for a set of behavioural

24 modifications that make an improbable vector, such as the GWF, into an efficient agent that  
25 increases horizontal transmission rates of PYVV.

## 26 **Highlights**

- 27 • PYVD reduces the survival of GWF and increases development time when  
28 symptoms occur
- 29 • PYVD symptom makes potato, a non-host plant, attractive to GWF
- 30 • After feeding on infected plants, GWF preference changes to prefer uninfected  
31 plants
- 32 • PYVV modulates GWF behaviour to enhance horizontal transmission between  
33 plants

34 **Keywords:** *Trialeurodes vaporariorum*, *Potato yellow vein virus* (PYVV), Crinivirus,  
35 horizontal transmission, host plant preference, greenhouse whitefly, potato diseases

## 36 **Introduction**

37 Viruses rely on hosts for replication, which is always detrimental to the host. As obligate  
38 parasites, viruses need to move from one host to another to persist which means that they  
39 require efficient mechanisms to enhance transmission rates. Plant viruses face additional  
40 difficulties since their hosts are immobile, which reduces the probability of transmission  
41 through direct contact between infected and uninfected individuals which is why many  
42 plant viruses rely on arthropod vectors (Hamelin, Allen, Prendeville, Hajimorad, & Jeger,  
43 2016; Jia et al., 2018). Vector transmission rates are often positively correlated with within-  
44 host multiplication rates and virulence (Pagán, Montes, Milgroom, & García-Arenal, 2014),  
45 but virulence may also increase host mortality, reducing the infectious period and

46 transmission rates. In fact, a wide body of evidence supports the trade-off hypothesis,  
47 which states that the level of virulence is driven by the optimum balance between within-  
48 and among-host parasite fitness traits (Alizon, Hurford, Mideo, & Van Baalen, 2009).  
49 Some vector-borne plant viruses can be transmitted both horizontally and vertically. In such  
50 cases, the level of virulence is often negatively correlated with host's fitness and, thus,  
51 expected to vary as a function of the transmission mode: virulence of virus strains selected  
52 for horizontal transmission is expected to be higher than that caused by their counterparts  
53 adapted for vertical transmission (Lipsitch, Siller, & Nowak, 1996). In the short-term,  
54 however, virulence and transmission mode may depend greatly on internal virus-host  
55 interactions, which will allow (or impede) viral particles to either multiply repeatedly at a  
56 cost to host fitness or reach its reproductive structures relatively harmlessly. Transmission  
57 mode is expected to be subjected to disruptive selection, i.e., both extremes vertical and  
58 horizontal are benefited against intermediate strains (Messenger, Molineux, & Bull, 1999),  
59 which implies that one transmission mode should be triggered according to the level of  
60 virulence achieved. While vertical transmission relies mainly on host survival and  
61 reproduction, horizontal transmission depends on vector attraction, arrestment and posterior  
62 migration to a healthy plant, all of which are, in part, mediated by biotic and abiotic  
63 conditions (plant nutrition and defences, climatic conditions, host availability) (Gallet,  
64 Michalakis, & Blanc, 2018; Kerry E. Mauck, Chesnais, & Shapiro, 2018; Su et al., 2015).  
65 Furthermore, the high level of virulence associated with vector-mediated transmission (i.e.,  
66 horizontal) should activate mechanisms that increase the probability of vectors carrying  
67 viral particles from infected to healthy hosts.

68 Symptom expression in host plants is usually associated with high levels of virulence and  
69 horizontal transmission of vector-borne viruses (Bosque-Pérez & Eigenbrode, 2011;  
70 Casteel & Jander, 2013; Kerry E Mauck, De Moraes, & Mescher, 2016). Viruses often  
71 manipulate vector behaviour to increase movement between infected and healthy hosts, but  
72 the behaviours which need to be manipulated depends on the modality of transmission,  
73 which may be persistent, non-persistent, or semi-persistent (Ng & Zhou, 2015). Even  
74 though all three benefit by manipulating symptoms to increase vector attraction towards  
75 infected plants, they differ in their need to retain the insect vector. Persistent viruses  
76 require greater arrestment since insects need to feed for longer periods of time for the virus  
77 to reach the gut and allow viral replication inside the vector. Conversely, the non-persistent  
78 viruses require low arrestment times since these viruses only persist for a limited time  
79 attached to the vector's mouthparts and need to infect new hosts quickly. Semi-persistent  
80 viruses, even though they do not replicate in the vector, may persist for a longer time in the  
81 vector's salivary glands and as such, require specific arrestment times (enough to be  
82 acquired, but not degraded). Disease progression may alter many plant processes and traits  
83 to achieve these behavioural changes in insect vectors, including changes in coloration,  
84 volatile profiles, alter plant defences, and nutritional quality depending on their mode of  
85 transmission (Feres & Moreno, 2009; Hogenhout, Ammar, Whitfield, & Redinbaugh,  
86 2008).

87 The *Potato yellow vein virus* (PYVV), is the causal agent of potato yellow vein disease  
88 (PYVD), a re-emerging epidemic of potato crops in northern South America which reduces  
89 yields by up to 50% (Cuadros et al., 2017; Rincon, Vasquez, Rivera-Trujillo, Beltrán, &  
90 Borrero-Echeverry, 2019). PYVV infection is transmitted vertically through infected seed

91 tubers and horizontally in a semi-persistent manner by the greenhouse whitefly (GWF)  
92 *Trialeurodes vaporariorum* (Westwood) (Hemiptera: Aleyrodidae) (Salazar 2000; Chávez  
93 2009). In South America, potato is normally cultivated above 1500 m.a.s.l. which is not  
94 optimal for GWF survival and development (Curry & Pimentel, 1971). Similarly, potato is  
95 not a preferred host for GWF under normal conditions, but outbreaks have been observed in  
96 association with PYVD (Cuadros et al., 2017). Furthermore, symptom expression of PYVD  
97 is associated with reduction in number and weight of tubers produced, while infected,  
98 asymptomatic plants vertically transmit the virus without showing such a yield reduction  
99 (Guzmán-Barney, Franco-Lara, Rodríguez, Vargas, & Fierro, 2012). Combined, these facts  
100 would suggest that GWF should be a poor vector for PYVV and that in order for it to be  
101 attracted towards infected potato plants, symptoms associated with PYVV virulence should  
102 be strong modulators of GWF behaviour.

103 We hypothesize that symptom expression of PYVD increases the attraction of GWF  
104 towards infected potato plants, but that arrestment should be low in symptomatic plants.  
105 Here, we studied the effect of symptom expression on population parameters and  
106 behavioural manipulation of GWF. We show that symptom expression has a negative effect  
107 on GWF development and survival. We also show that symptom expression differentially  
108 modulates GWF behaviour, depending on whether the vector has fed on healthy or infected  
109 plants. To our knowledge, this is the first report of a semi-persistent virus manipulating the  
110 behaviour of vector insects.

## 111 **Materials and methods**

### 112 **Vegetable material**

113 *Solanum tuberosum* Phureja group cv., (the Colombian Creole potato) plants were used for  
114 all experiments. Virus-free plants were obtained from *in vitro* culture to prevent  
115 contamination. Mini-tubers were planted in a soil-rice husk substrate (3:1) in 5.5 L pots and  
116 plants were grown under greenhouse conditions (22-35°C, 4-6 lux, 50-70%RH) inside a  
117 mesh cage (mesh size 1.35 mm) to avoid infestation by insect vectors that could carry  
118 PVV until the fourth week after sowing (code 105 in potato's BCCH scale). Plants were  
119 then transferred to environmental chambers (Sanyo® MLR 351) set to the required  
120 conditions (16 °C±1, 4 lux, and 55±10% RH). Plants were watered twice per week until  
121 reaching field capacity.

122 Infected plants came from symptomatic plants (intreveinal yellowing of primary and  
123 secondary veins on the upper third of the plant) collected in the municipality of Subachoque  
124 (Cundinamarca, Colombia) (4.978093, -74.155993). Symptomatic field-collected plants  
125 were taken to the laboratory and used as donor plants to infect virus-free three-week-old  
126 plants, according to the procedure established by Vargas (2010). Newly infected plants  
127 were subjected to the same conditions in the environmental chambers as virus-free plants  
128 (16 °C±1, 4 lux, and 55±10% RH). Both infected and virus-free plants were subsequently  
129 evaluated for the presence or absence of the virus by RT-PCR according to the protocol  
130 established by Hernandez-Guzmán and Guzmán-Barney (2014). Plants were classified as  
131 symptomatic, asymptomatic, and virus-free plants for the experiments.

## 132 Whitefly rearing

133 GWF adults were obtained from the colony at AGROSAVIA's entomology lab, (Tibaitatá  
134 Research Centre, Mosquera, Colombia). GWF was reared on bean plants (*Phaseolus*  
135 *vulgaris* L.) in order to avoid contact with a possible PYVV host in an isolated room in a  
136 glasshouse (22-35°C, 4-6 lux, 50-70%RH). Viruliferous insects were obtained by allowing  
137 them to feed on symptomatic plants obtained from the field, confirmed through RT-PCT.  
138 Transmission of PYVV by action of viruliferous GWF was by releasing 30 newly emerged  
139 GWF adults on leaves of plants expressing PYVD symptoms. Whiteflies were kept in  
140 clamp cages on the underside of symptomatic potato leaves for 48 hours. Insects were then  
141 transferred to virus-free plants using the same method to infect new plants. Insects could  
142 feed for 48 hours and were then removed. To confirm the presence of PYVV in the plants,  
143 RT-PCR was performed as described below.

## 144 Life cycle parameter bioassays

145 In order to determine the effect of PYVD symptoms on development and survival rates of  
146 GWF individuals, an experiment with three treatments in a completely randomized design  
147 was established. Healthy, infected symptomatic and infected asymptomatic plants were  
148 placed in environmental chambers at 16 °C±1, 4 lux, and 55±10% RH. Ten male-female  
149 pairs of GWF adults were released in leaf cages on the underside of three randomly-  
150 selected leaflets of each plant. Each treatment consisted of eight plants. After 48 hours,  
151 adults were removed from the plants and the number of live and dead nymphs, and  
152 development stage (eggs, nymphs, adults) were registered daily for 60 days or until all  
153 immature GWF emerges as adults or died.



## 154 Free-choice bioassays

155 Free-choice bioassays were carried out under controlled conditions (16°C±1, 4 Lux, 65%-  
156 75% RH) at the Tibaitatá Research Centre. GWF were collected from the colony and kept  
157 in a 5 mL cup. GWF were then transferred to a freezer (4°C±1) for five minutes to reduce  
158 their mobility. Virus-free, symptomatic and asymptomatic leaves were kept in vials with  
159 water inside mesh cages (1 x 1 x 0.8 m) equidistant in a triangular arrangement, 30 cm  
160 apart. Ten GWF adults were then released in the centroid of the triangle, and the number of  
161 adults on each leaf was evaluated after 30, 60, 120, 240, and 1440 minutes. Each trial was  
162 repeated 30 times using different leaves and insects (300 insects total). Bioassays were  
163 performed using both non-viruliferous and viruliferous insects to determine if there were  
164 host preference changes due to virus uptake.

## 165 RT-PCR detection

166 RNA extraction was carried out using the protocol described by Hernandez-Guzmán and  
167 Guzmán-Barney (2014). All RNA extracts were obtained using Trizol® (Invitrogen)  
168 according to the manufacturer's instructions. The cDNA synthesis was carried out by  
169 mixing 2 µL of 1X reaction buffer, 0.5 µL of 1 mM dNTPs, 1 µL of 10 mM DTT, 0.5 µL  
170 of 0.4 µM of 3' reverse primer, 0.4 µL of RNase inhibitor, 0.5 µL of MMLV HP and 100  
171 ng of RNA for each reaction. The mix was kept at 42 °C for one hour followed by  
172 denaturation at 70°C for 10min.

173 The PCR reactions contained 2 µL of cDNA, 2 µL of 1X NH<sub>4</sub> buffer, 1 µL of 25 mM  
174 MgCl<sub>2</sub>, 0.4 µL of 10 µM dNTPs, 0.4 µL of each forward, and reverse primers to obtain a  
175 final volume of 10 µL. The amplification program was set to an initial denaturation at 94  
176 °C for 3 min, 35 cycles of denaturation at 94°C for 1 min, alignment at 55°C for 1 min and

177 extension at 72°C for 1 min followed by a final extension at 72°C for 10 min. As a positive  
178 control, a leaf sample of potato plants expressing PVYD symptoms was included. As  
179 negative controls, a leaf sample of a cape gooseberry plant (*Physalis peruviana*) infected  
180 with *Tobacco mosaic virus* (TMV), and a virus-free potato leaf sample (obtained by *in vitro*  
181 meristems culture).

## 182 Data analysis

183 To compare the average development times of nymphs that fed on symptomatic,  
184 asymptomatic and virus-free plants, log-logistic models were constructed describing the  
185 proportion of emerged adults, as a function of time,  $t$ :

$$186 \frac{1}{1 + (b(\log(t) - \log(e)))}$$

187 where  $b$  and  $e$  are parameters estimated from the data, the former denotes the steepness of  
188 the curve and the last equals the midpoint of the s-shaped curve. Parameter  $e$  (average time  
189 at which 50% of adults emerge) was used to compare development times among treatments  
190 (healthy, asymptomatic and symptomatic plants). The parameters were estimated by  
191 maximum likelihood estimation, assuming a binomial distribution of the response variable.  
192 Comparison of estimates of  $e$  were compared through t-tests.

193 To assess differences in survival of individuals feeding on the healthy, symptomatic and  
194 asymptomatic plants, a generalized linear model with a binomial distribution was fit. The  
195 treatment (virus-free, asymptomatic infected and symptomatic infected) was used as an  
196 explanatory variable with virus-free plants as the reference factor level. The magnitude of  
197 the difference and the significance between the symptomatic, asymptomatic and virus-free

198 levels was examined by Tukey’s post-hoc range test analysis adjusted for generalized  
199 models (Bretz, Dette, & Pinheiro, 2010).

200 For the free-choice bioassays, a multinomial regression analysis was fit for both non-  
201 viruliferous and viruliferous GWF to model the proportion of adults selecting each  
202 treatment over time. The significance of each model was tested against the null model using  
203 a chi-square test. To test for differences within each evaluation time (against the null  
204 hypothesis of GWF adults selecting treatments at equal proportions), repeated G-test of  
205 goodness-of-fit were performed. G-tests are similar to chi-squared test of goodness-of-fit,  
206 but they allow for the inclusion of repetitions (trials), because the G-values of independent  
207 repetitions add up to an overall G-value for the whole experiment (Agresti, 2018). Thus, G-  
208 values for each trial were estimated and then they were summed for each evaluation time.  
209 P-values were calculated from chi-squared distributions using the summed degrees of  
210 freedom for each evaluation time. We also performed chi-squared pairwise comparisons of  
211 proportions as *poshoc* tests with the data of evaluation times for which significant  
212 deviations from equal probabilities were detected with G-tests. Holm’s correction was  
213 included to adjust P-values for multiple comparisons (Wright, 1992).

214 All analyses were carried out using R software (R Core Team, 2020). The package “drc”  
215 was used for parameter estimation of development models (Ritz, Baty, Streibig, & Gerhard,  
216 2016), and G-tests for free-choice data were performed using “DescTools” (Signorell et al.,  
217 2020).

## 218 **Results**

### 219 **Presence of Potato yellow vein virus (PYVV)**

220 A total of 72 plants were tested. Of the 72 plants, 24 came from in vitro microtubers and all  
221 tested negative for PYVV. The remaining 48 plants (24 symptomatic and 24 asymptomatic)  
222 came from symptomatic field-collected plants according to the infection protocol above.

223 All 48 plants tested positive for PYVV in RT-PCR analyses. These results confirm that our  
224 interpretation of disease symptoms is adequate and that our infection procedure was  
225 effective. Of each set of plants, six were used in life parameter assays and the rest were  
226 used to obtain leaflets for behavioural experiments.

### 227 **Life cycle parameters**

228 Symptom expression had a significant effect on the life cycle of GWF. Nymphs fed on  
229 infected plants with yellowing symptoms took longer to develop into adults ( $58.643 \pm$   
230  $0.147$  days) than those fed on healthy ( $53.086 \pm 0.1697$  days) or asymptomatic plants  
231 ( $50.571 \pm 0.109$  days). Interestingly, GWF fed on infected asymptomatic plants developed  
232 significantly faster than those fed virus-free plants (Figure 1A).

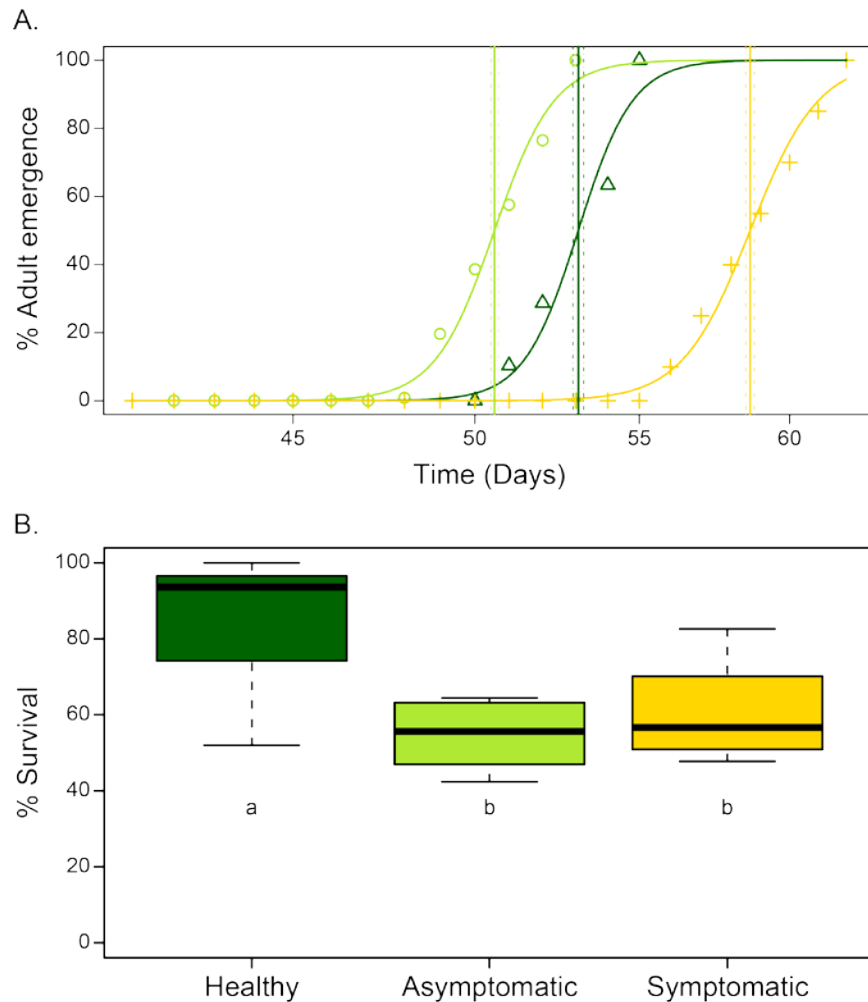

233

234 **Figure 1: Adult emergence and survival.** A. Time in days needed by GWF to reach  
235 adulthood when reared on healthy potato plants (dark green), PYVV infected,  
236 asymptomatic plants (light green) and PYVV infected, symptomatic plants (yellow). Lines  
237 represent the average emergence time and the 95% confidence interval. B. Percent of  
238 nymph survival to adulthood when reared on healthy potato plants (dark green), PYVV  
239 infected, asymptomatic plants (light green) and PYVV infected, symptomatic plants  
240 (yellow).

241 We found that survival rate of GWF nymphs was significantly affected by PYVV infection  
242 ( $X^2 = 81.059$ ,  $P < 0.001$ ). In fact, the *poshoc* analysis revealed that PYVV infection

243 affected survival of GWF nymphs regardless symptom expression, since survival was  
244 equally reduced in nymphs fed with either symptomatic (mean survival =  $60.702 \pm 4.414$   
245 %) or asymptomatic plants (mean survival =  $54.803 \pm 3.079$  %), compared to those that  
246 were fed in healthy plants (mean survival =  $85.072 \pm 6.186$  %) (Figure 1B).

## 247 Free-choice bioassays

### 248 Non-viruliferous GWF host choice and settlement

249 Host-plant preference of GWF adults without previous exposure to PYVV was consistent  
250 throughout the observation time, according to the multinomial regression model ( $X^2 =$   
251 2,300,  $P = 0.3166$ ). GWF adults consistently preferred symptomatic, followed by  
252 asymptomatic and rarely chose, and settled on healthy leaflets (Figure 2A, Table 1).

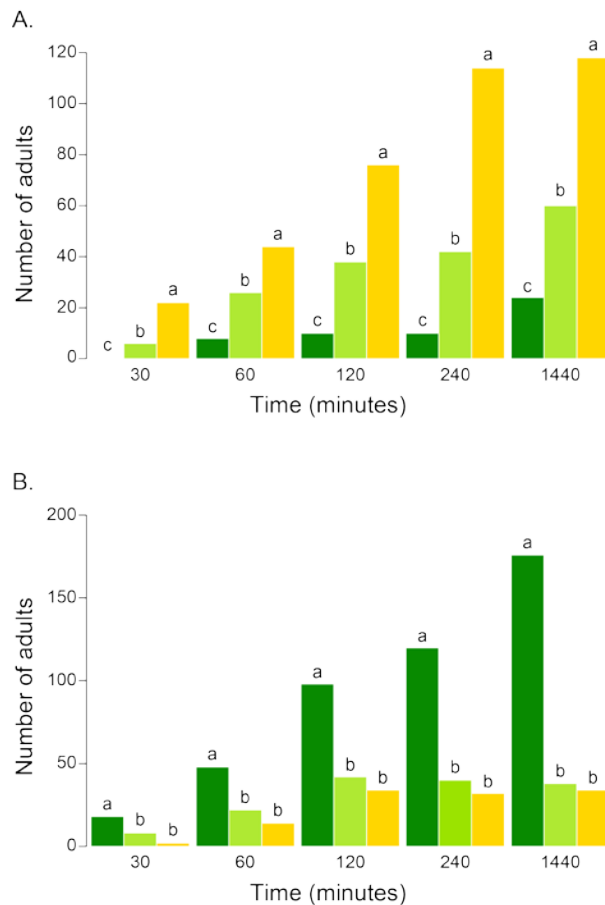

253

254 **Figure 2. Host plant preference of GWF adults over time.** A. Host plant choice of non-  
255 viruliferous (previously fed on bean plants) GWF adults in three-way experiments. B. Host  
256 plant choice of viruliferous (previously fed on PYVD symptomatic potato plants) GWF  
257 adults in three-way experiments. Dark green bars represent healthy potato plants, light  
258 green bars represent PYVV infected, asymptomatic plants and yellow bars represent PYVV  
259 infected, symptomatic plants. Different letters above the bars denote significant differences,  
260 according to chi-squared pairwise comparisons ( $P < 0.05$ ), which were performed for each  
261 evaluation time independently.

262 **Table 1.** Repeated G-tests of goodness-of-fit for each evaluation time for a free-choice test  
263 with adults of *Trialeurodes vaporariorum* with no previous contact with PYVV. The G-  
264 value presented is the summed value of independent repetitions for each time. Degrees of  
265 freedom (DF) differ among times because the trials with no responses were removed from  
266 the analysis ( $N = 30$ ).

|          | T1 (30 min) | T2 (60 min) | T3 (120 min) | T4 (240 min) | T5 (1440 min) |
|----------|-------------|-------------|--------------|--------------|---------------|
| G-value  | 52.524      | 94.833      | 92.319       | 151.339      | 124.515       |
| DF       | 32          | 60          | 60           | 60           | 60            |
| <i>P</i> | 0.0125      | 0.0027      | 0.0046       | < 0.0001     | < 0.0001      |

#### 267 [Viruliferous GWF host choice and settlement](#)

268 GWF adults that had previous experience feeding on PYVV-infected plants showed a  
269 contrasting host-plant preference in relation with conspecifics without such experience. We  
270 found that the proportion of insects that chose healthy leaflets over symptomatic or  
271 asymptomatic leaflets increased over time ( $X^2 = 8.992$ ,  $P = 0.011$ ) (Figure 2B). No

272 differences were detected in preference for PYVV-infected leaflets, whether they were  
273 symptomatic or not (Figure 2B, Table 2).

274 **Table 2.** Repeated G-tests of goodness-of-fit for each evaluation time for a free-choice test  
275 with adults of *Trialeurodes vaporariorum* with previous contact with PYVV. The G-value  
276 presented is the summed value of independent repetitions for each time. Degrees of  
277 freedom (DF) differ among times because the trials with no responses were removed from  
278 the analysis ( $N = 30$ ).

|          | <b>T1 (30 min)</b> | <b>T2 (60 min)</b> | <b>T3 (120 min)</b> | <b>T4 (240 min)</b> | <b>T5 (1440 min)</b> |
|----------|--------------------|--------------------|---------------------|---------------------|----------------------|
| G-value  | 50.431             | 92.070             | 99.6371             | 146.736             | 215.992              |
| DF       | 28                 | 56                 | 60                  | 60                  | 60                   |
| <i>P</i> | 0.0057             | 0.0017             | 0.00099             | < 0.0001            | < 0.0001             |

## 279 Discussion

280 It is difficult to understand how a generalist insect, such as the GWF, could begin to  
281 actively prefer a non-host plant. In order for this to happen, either the insect would need to  
282 change its preferences to include the previously non-host plant, or the plant would need to  
283 begin giving off the proper cues for the insect to begin finding it attractive. While this kind  
284 of cognitive change is less likely to occur and establish itself in an insect population  
285 (Libersat, Kaiser, & Emanuel, 2018), it is common for plant's metabolism to be altered by  
286 biotic (diseases, herbivory, phenology) and abiotic (drought, nutrient stress) factors in such  
287 a way that the cues they produce change substantially. Such cues (often associated with  
288 symptom expression) may include changes in plant coloration and leaf structure (Lu et al.,



289 2017), volatile profile (Fereres et al., 2016), nutritional quality (Bosque-Pérez &  
290 Eigenbrode, 2011; Kerry E. Mauck et al., 2018; Szczepaniec & Finke, 2019), and/or  
291 nutrient allocation (Byrne & Bellows Jr, 1991; Fereres, 2015; Szczepaniec & Finke, 2019).

292 Physical and chemical cues generated by virus-infected hosts are fundamental to the  
293 behavioural manipulation of insect vectors. Behavioural manipulation of insect vectors  
294 through symptom expression has been widely studied in different plant-virus families  
295 (Colvin et al., 2006; Fereres et al., 2016; Van Roermund & van Lenteren, 1992) including  
296 criniviruses (Jones, 2003; Martelli et al., 2002; Navas-Castillo, López-Moya, & Aranda,  
297 2014; Osorio et al., 2016). Yellowing, the most noticeable symptom of PYVD, plays an  
298 important role in turning potato plants from being unattractive for GWF into a potential  
299 host. Like many hemipterans, GWF is attracted to yellow (Vaishampayan, Kogan,  
300 Waldbauer, & Woolley, 1975) so it could be predicted that yellowing would increase  
301 attraction of GWF to a non-plant. Our results show that this is, in fact, the case. Non-  
302 viruliferous GFW adults significantly prefer leaves that express PPYD yellowing over  
303 green leaves and remain and feed on them in approximately constant proportions, at least  
304 over the duration of our experiment (1440 minutes). By doing so, they accomplish the first  
305 step required for there to be horizontal transmission of PYVV which is the uptake of the  
306 virus. Curiously, leaves from infected, asymptomatic plants show an intermediate attraction  
307 and arrestment of GWF adults, suggesting that while not obvious to us, there are more  
308 symptoms at play that we are unable to easily detect, such as changes in the volatile profile  
309 of plants. It remains to be seen if these unseen symptoms of infected plants that have not  
310 begun to express yellowing are enough to attract GWF in the field.

311 The second key factor for horizontal transmission through vectors to be feasible is  
312 arrestment of insects on infected plants in order for them to uptake the virus. According to  
313 the postulates of semi-persistent virus transmission, vectors should spend a moderate  
314 amount of time feeding on infected plants in order to acquire enough viral titre to establish  
315 itself in the insect's mouth parts and foregut before they move to a new host. The fact that  
316 GWF development rate is slower when individuals are reared on symptomatic plants  
317 compared to when they develop in healthy plants is likely an effect of reduced nutritional  
318 properties of diseased plants, but it may also favour the uptake of viral particles through  
319 prolonged feeding duration, likely facilitating horizontal transmission. In fact, such  
320 decreased nutritional quality of infected plants may explain why nymphs fed with both  
321 symptomatic and asymptomatic plants showed reduced survival compared to those fed with  
322 healthy plants (Chesnais et al., 2019). The reduced nutritional quality of infected plants  
323 may also be a stimulus for adult GWF to seek out a better-quality host, leading to the third  
324 necessary step for horizontal transmission to occur. Curiously, GWF development rate  
325 increased when nymphs were reared on infected, asymptomatic plants, suggesting that there  
326 may be benefits to feeding on plants that do not express symptoms compared to both  
327 healthy and symptomatic plants. Plants being attacked by a virus and an insect,  
328 simultaneously, must spend more energy on defences for both. However, if insects arrive  
329 on a plant which has already been infected, but whose nutritional quality is not affected yet,  
330 it may be able to take advantage of the fact that the plant is already using resources and  
331 activating its defences against the virus, and increase its ability to reproduce and develop.  
332 Virus-free plants, on the other hand, may concentrate their defences against the insect  
333 herbivore, thus reducing their reproductive potential and increasing their development time

334 (Bak, Cheung, Yang, Whitham, & Casteel, 2017; Gallet et al., 2018; Tzanetakis, Martin, &  
335 Wintermantel, 2013).

336 Combined with reduced nutritional quality, we see that viral acquisition also seems to  
337 directly affect GWF host preference. Interestingly, although only the proximal parts of the  
338 midgut and mouthparts are reached by semi-persistent viruses, PYVV seems to be able to  
339 alter vector host preference to increase the dispersion of viral particles from infected to  
340 healthy hosts. Similar to what has been observed in other systems such as that of *Tomato*  
341 *severe rugose virus* (ToSRV, Geminiviridae) and *Tomato chlorosis virus* (ToCV,  
342 Closteroviridae) (Bosque-Pérez & Eigenbrode, 2011; Casteel et al., 2014; Fereres et al.,  
343 2016; Peñafior, Mauck, Alves, De Moraes, & Mescher, 2016; Wu, Davis, & Eigenbrode,  
344 2014), GWF adults change their host preference as a function of their previous exposure to  
345 PYVV-infected plants. Changes in insect host-preference modulated by the pre-acquisition  
346 of viruses has been well documented for persistent viruses which replicate inside the vector  
347 (He, Li, & Liu, 2015). However, our results show that a semi-persistent virus, through an  
348 unknown mechanism, may also modulate insect behaviour in contrast to what has been  
349 previously reported in other studies (Whitfield, Falk, & Rotenberg, 2015). This highlights  
350 the lack of understanding we have on semi-persistent viruses and how broad the spectrum  
351 of characteristics between non-persistent and persistent viruses actually is. It is likely that,  
352 while PYVV may not directly affect GWF cognitive behaviour, classical conditioning of  
353 GWF adults may explain GWF behavioural manipulation through symptom expression  
354 after PYVV infection in potato plants. We hypothesize that the exposure of GWF adults to  
355 low-quality hostplants (e.g., infected, symptomatic potato plants) may alter GWF's further  
356 associations of stimuli with preferred hosts. If that is the case, the whole profile of cues

357 associated with PYVV-infected, symptomatic plants will no longer be used to recognize  
358 suitable hosts by experienced GWF adults. Effects of previous experience on host-selection  
359 by whiteflies, including the GWF, has been documented elsewhere (Lee, Nyrop, &  
360 Sanderson, 2010; Shah & Liu, 2013), and classical conditioning has also been reported for  
361 other Hemiptera (Stockton, Martini, Patt, & Stelinski, 2016).

362 In the PYVV-GWF-potato system, symptom expression reduces tuber formation (and  
363 vertical transmission rates) (Guzmán-Barney et al., 2012), so it is expected that symptoms  
364 are part of an effective strategy to maximize vector-borne (horizontal) transmission. The  
365 changes caused by PYVD on host plants are consistent with the hypothesis that the  
366 generation of symptoms by viral infection modifies insect vector behaviour and  
367 development to enhance horizontal transmission. Our results suggest that semi-persistent  
368 viruses have far more complex strategies for horizontal transmission than was previously  
369 thought. Even though we have shown that a semi-persistent virus may affect vector  
370 attraction, arrestment, and new host plant choice through the expression of symptoms, the  
371 mechanisms behind this behavioural modulation remain unclear. Further experiments into  
372 symptoms, such as changes in volatile profiles, and their comparisons to those of GWF  
373 hosts are crucial to understand the ecology behind the host plant shift observed.

374 Bromatological studies will help us to understand how the virus could manipulate both  
375 vector arrestment and release in order to make sure that there is sufficient uptake of viral  
376 particles. Lastly, it would be interesting to see what the effects of viral uptake are on GWF  
377 physiology and brain chemistry. It remains difficult to understand how a virus which does  
378 not persist for long periods of time in an insect, or replicate within, is capable of completely  
379 reversing host-choice. Understanding the underlying mechanism behind this will broaden

380 our understanding of semi-persistent and perhaps break the boundaries of viral  
381 classification.

## 382 **Conclusions**

383 We evidenced that physiological changes derived from PYVV infection in potato plants  
384 alter development, survival and behaviour of the insect vector, the GWF. In particular, the  
385 characteristic yellowing seems to be associated with low-nutritional quality (longer  
386 immature development times and reduced survival) for the GWF, but quite attractive to  
387 GWF adults with no previous exposure to PYVV-infected plants. In contrast, green, healthy  
388 plants seem to provide better nutritional quality (shorter immature development times) than  
389 infected plants for the GWF and be particularly attractive to adults that had been previously  
390 exposed to PYVV-infected plants. Altogether, we present new insights on the ecological  
391 relationships between viruses, plants and insect vectors, and how physiological and  
392 morphological consequences of viral infections in plants may act as modulators of plant-  
393 vector interactions.

## 394 **Acknowledgements**

395 We are grateful to Anngie K. Hernandez and Diana M. Torres (AGROSAVIA) who carried  
396 PYVV detection tests on potato seed tubers. This study was funded by the Ministerio de  
397 Agricultura y Desarrollo Rural de Colombia with government funds allocated to the  
398 Corporación Colombiana de Investigación Agropecuaria (AGROSAVIA) (Grant:  
399 “Generación y validación de tecnologías sostenibles de producción para incrementar la  
400 competitividad de la cadena de la papa en Colombia”). Research support was provided by

401 government funds assigned to AGROSAVIA. The authors assume full responsibility for the  
402 interpretation of results and ideas presented in this manuscript.

### 403 **Conflict of Interests**

404 The authors declare that there are no conflicts of interest

### 405 **Author contribution**

406 All authors contributed equally to the analysis of results, writing and reviewing of the  
407 manuscript.

408 DFV: Contributed to the original idea as well as the hypotheses. Designed, and carried out  
409 the experiments. Collected and organized data. Contributed to the statistical analysis.

410 DFR: Had the original idea and contributed to the consolidation of the hypotheses. Helped  
411 in the organization and systematization of the data. Carried out statistical analysis.

412 FB-E: Contributed to the consolidation of the hypotheses. Contributed to the design of  
413 experiments.

### 414 **Data Availability**

415 The datasets generated, collected and/or analyzed during the current study are available  
416 from the corresponding author on reasonable request, according to institutional guidelines.

### 417 **References**

- 418 Agresti, A. (2018). *An introduction to categorical data analysis*: John Wiley & Sons.  
419 Alizon, S., Hurford, A., Mideo, N., & Van Baalen, M. (2009). Virulence evolution and the  
420 trade-off hypothesis: history, current state of affairs and the future. *J Evol Biol*, 22(2),  
421 245-259. doi: 10.1111/j.1420-9101.2008.01658.x  
422 Bak, A., Cheung, A. L., Yang, C., Whitham, S. A., & Casteel, C. L. (2017). A viral protease  
423 relocalizes in the presence of the vector to promote vector performance. *Nature*  
424 *Communications*, 8(1), 14493. doi: 10.1038/ncomms14493

- 425 Bosque-Pérez, N. A., & Eigenbrode, S. D. (2011). The influence of virus-induced changes in  
426 plants on aphid vectors: Insights from luteovirus pathosystems. *Virus Research*,  
427 *159*(2), 201-205. doi: 10.1016/j.virusres.2011.04.020
- 428 Bretz, F., Dette, H., & Pinheiro, J. C. (2010). Practical considerations for optimal designs in  
429 clinical dose finding studies. *Statistics in Medicine*, *29*(7-8), 731-742. doi:  
430 10.1002/sim.3802
- 431 Byrne, D. N., & Bellows Jr, T. S. (1991). Whitefly biology. *Annual Review of Entomology*,  
432 *36*(1), 431-457.
- 433 Casteel, C. L., & Jander, G. (2013). New synthesis: Investigating mutualisms in virus-vector  
434 interactions. *Journal of Chemical Ecology*, *39*(7), 809-809. doi: 10.1007/s10886-013-  
435 0305-0
- 436 Casteel, C. L., Yang, C., Nanduri, A. C., De Jong, H. N., Whitham, S. A., & Jander, G.  
437 (2014). The NIa-Pro protein of Turnip mosaic virus improves growth and  
438 reproduction of the aphid vector, *Myzus persicae* (green peach aphid). *The Plant*  
439 *Journal*, *77*(4), 653-663. doi: 10.1111/tpj.12417
- 440 Chesnais, Q., Mauck, K. E., Bogaert, F., Bamière, A., Catterou, M., Spicher, F., . . . Ameline,  
441 A. (2019). Virus effects on plant quality and vector behavior are species specific and  
442 do not depend on host physiological phenotype. *Journal of Pest Science*, *92*(2), 791-  
443 804. doi: 10.1007/s10340-019-01082-z
- 444 Colvin, J., Omongo, C. A., Govindappa, M. R., Stevenson, P. C., Maruthi, M. N., Gibson,  
445 G., . . . Muniyappa, V. (2006). Host-plant viral infection effects on arthropod-vector  
446 population growth, development and behaviour: Management and epidemiological  
447 implications *Advances in Virus Research* (Vol. 67, pp. 419-452): Academic Press.
- 448 Cuadros, D. F., Hernandez, A., Torres, M. F., Torres, D. M., Branscum, A. J., & Rincon, D.  
449 F. (2017). Vector transmission alone fails to explain the potato yellow vein virus  
450 epidemic among potato crops in Colombia. [Original Research]. *Frontiers in Plant*  
451 *Science*, *8*(1654), 1654. doi: 10.3389/fpls.2017.01654
- 452 Curry, J. P., & Pimentel, D. (1971). Life cycle of the Greenhouse Whitefly, *Trialeurodes*  
453 *vaporariorum*, and population trends of the whitefly and its parasite, *Encarsis*  
454 *formosa*, on two tomato varieties. *Annals of the Entomological Society of America*,  
455 *64*(5), 1188-1190. doi: 10.1093/aesa/64.5.1188 %J
- 456 Fereres, A. (2015). Insect vectors as drivers of plant virus emergence. *Current Opinion in*  
457 *Virology*, *10*(Complete), 42-46. doi: 10.1016/j.coviro.2014.12.008
- 458 Fereres, A., & Moreno, A. (2009). Behavioural aspects influencing plant virus transmission  
459 by homopteran insects. *Virus Research*, *141*(2), 158-168. doi:  
460 10.1016/j.virusres.2008.10.020
- 461 Fereres, A., Peñaflor, M. F. G., Favaro, C. F., Azevedo, K. E., Landi, C. H., Maluta, N. K., .  
462 . . Lopes, J. R. J. V. (2016). Tomato infection by whitefly-transmitted circulative and  
463 non-circulative viruses induce contrasting changes in plant volatiles and vector  
464 behaviour. *Viruses*, *8*(8), 225. doi: 10.3390/v8080225
- 465 Gallet, R., Michalakakis, Y., & Blanc, S. (2018). Vector-transmission of plant viruses and  
466 constraints imposed by virus-vector interactions. *Current Opinion in Virology*, *33*,  
467 144-150. doi: 10.1016/j.coviro.2018.08.005
- 468 Guzmán-Barney, M., Franco-Lara, L., Rodríguez, D., Vargas, L., & Fierro, J. E. (2012).  
469 Yield losses in Solanum tuberosum Group Phureja Cultivar Criolla Colombia in  
470 Plants with Symptoms of PVV in Field Trials. *American Journal of Potato*  
471 *Research*, *89*(6), 438-447. doi: 10.1007/s12230-012-9265-0

- 472 Hamelin, F. M., Allen, L. J. S., Prendeville, H. R., Hajimorad, M. R., & Jeger, M. J. (2016).  
473 The evolution of plant virus transmission pathways. *Journal of Theoretical Biology*,  
474 396, 75-89. doi: 10.1016/j.jtbi.2016.02.017
- 475 He, W.-B., Li, J., & Liu, S.-S. (2015). Differential profiles of direct and indirect modification  
476 of vector feeding behaviour by a plant virus. *Scientific Reports*, 5(1), 7682. doi:  
477 10.1038/srep07682
- 478 Hernández-Guzmán, A. K., & Guzmán-Barney, M. (2014). Detección del virus del  
479 amarillamiento de las nervaduras de la hoja de la papa en diferentes órganos de  
480 *Solanum tuberosum* grupo Phureja cv Criolla Colombia utilizando RT-PCR  
481 convencional y en tiempo real. *Revista Colombiana de Biotecnología*, 16(1), 74-85.
- 482 Hogenhout, S. A., Ammar, E.-D., Whitfield, A. E., & Redinbaugh, M. G. (2008). Insect  
483 vector interactions with persistently transmitted viruses. *Annual Review of*  
484 *Phytopathology*, 46(1), 327-359. doi: 10.1146/annurev.phyto.022508.092135
- 485 Jia, D., Chen, Q., Mao, Q., Zhang, X., Wu, W., Chen, H., . . . Wei, T. (2018). Vector mediated  
486 transmission of persistently transmitted plant viruses. *Current Opinion in Virology*,  
487 28, 127-132. doi: 10.1016/j.coviro.2017.12.004
- 488 Jones, D. R. (2003). Plant viruses transmitted by whiteflies. *European Journal of Plant*  
489 *Pathology*, 109(3), 195-219. doi: 10.1023/A:1022846630513
- 490 Lee, D.-H., Nyrop, J. P., & Sanderson, J. P. (2010). Effect of host experience of the  
491 greenhouse whitefly, *Trialeurodes vaporariorum*, on trap cropping effectiveness.  
492 *Entomologia Experimentalis et Applicata*, 137(2), 193-203. doi: 10.1111/j.1570-  
493 7458.2010.01052.x
- 494 Libersat, F., Kaiser, M., & Emanuel, S. (2018). Mind control: How parasites manipulate  
495 cognitive functions in their insect hosts. [Perspective]. *Frontiers in Psychology*,  
496 9(572). doi: 10.3389/fpsyg.2018.00572
- 497 Lipsitch, M., Siller, S., & Nowak, M. A. (1996). The evolution of virulence in pathogens  
498 with vertical and horizontal transmission. *Evolution*, 50(5), 1729-1741. doi:  
499 10.1111/j.1558-5646.1996.tb03560.x
- 500 Lu, S., Li, J., Wang, X., Song, D., Bai, R., Shi, Y., . . . Yan, F. (2017). A semipersistent plant  
501 virus differentially manipulates feeding behaviors of different sexes and biotypes of  
502 its whitefly vector. *Viruses*, 9(1), 4. doi: 10.3390/v9010004
- 503 Martelli, G. P., Agranovsky, A. A., Bar-Joseph, M., Boscia, D., Candresse, T., Coutts, R. H.  
504 A., . . . Yoshikawa, N. (2002). The family Closteroviridae revised. *Archives of*  
505 *Virology*, 147(10), 2039-2044. doi: 10.1007/s007050200048
- 506 Mauck, K. E., Chesnais, Q., & Shapiro, L. R. (2018). Evolutionary determinants of host and  
507 vector manipulation by plant viruses. In C. M. Malmstrom (Ed.), *Advances in Virus*  
508 *Research* (Vol. 101, pp. 189-250): Academic Press.
- 509 Mauck, K. E., De Moraes, C. M., & Mescher, M. C. (2016). Effects of pathogens on sensory-  
510 mediated interactions between plants and insect vectors. *Current Opinion in Plant*  
511 *Biology*, 32, 53-61.
- 512 Messenger, S. L., Molineux, I. J., & Bull, J. J. (1999). Virulence evolution in a virus obeys a  
513 trade-off. *Proc Biol Sci*, 266(1417), 397-404. doi: 10.1098/rspb.1999.0651
- 514 Navas-Castillo, J., López-Moya, J. J., & Aranda, M. A. (2014). Whitefly-transmitted RNA  
515 viruses that affect intensive vegetable production. *Annals of Applied Biology*, 165(2),  
516 155-171. doi: 10.1111/aab.12147



- 517 Ng, J. C. K., & Zhou, J. S. (2015). Insect vector–plant virus interactions associated with non-  
518 circulative, semi-persistent transmission: Current perspectives and future challenges.  
519 *Current Opinion in Virology*, *15*, 48-55. doi: 10.1016/j.coviro.2015.07.006
- 520 Osorio, M., Marques, A., Romay, G., Roa, S., Demey, J., & Vegas, A. (2016). Adaptación  
521 de la técnica RT-PCR para el diagnóstico del virus del amarillamiento de las venas  
522 de papa en Venezuela. *Bioagro*, *28*(1), 047-052.
- 523 Pagán, I., Montes, N., Milgroom, M. G., & García-Arenal, F. (2014). Vertical transmission  
524 selects for reduced virulence in a plant virus and for increased resistance in the host.  
525 *PLOS Pathogens*, *10*(7), e1004293. doi: 10.1371/journal.ppat.1004293
- 526 Peñaflo, M. F. G. V., Mauck, K. E., Alves, K. J., De Moraes, C. M., & Mescher, M. C.  
527 (2016). Effects of single and mixed infections of Bean pod mottle virus and Soybean  
528 mosaic virus on host-plant chemistry and host–vector interactions. *Functional*  
529 *Ecology*, *30*(10), 1648-1659. doi: 10.1111/1365-2435.12649
- 530 R Core Team. (2020). R: A Language and environment for statistical computing (Version  
531 Version 3.5.1. "Feather Spray"). Vienna, Austria: R Foundation for Statistical  
532 Computing. Retrieved from <http://www.R-project.org/>
- 533 Rincon, D. F., Vasquez, D. F., Rivera-Trujillo, H. F., Beltrán, C., & Borrero-Echeverry, F.  
534 (2019). Economic injury levels for the potato yellow vein disease and its vector,  
535 *Trialeurodes vaporariorum* (Hemiptera: Aleyrodidae), affecting potato crops in the  
536 Andes. *Crop Protection*, *119*, 52-58. doi: 10.1016/j.cropro.2019.01.002
- 537 Ritz, C., Baty, F., Streibig, J. C., & Gerhard, D. (2016). Dose-response analysis using R.  
538 *PLOS ONE*, *10*(12), e0146021. doi: 10.1371/journal.pone.0146021
- 539 Shah, M. M. R., & Liu, T.-X. (2013). Feeding experience of *Bemisia tabaci* (Hemiptera:  
540 Aleyrodidae) affects their performance on different host plants. *PloS one*, *8*(10),  
541 e77368-e77368. doi: 10.1371/journal.pone.0077368
- 542 Signorell, A., Aho, K., Alfons, A., Anderegg, N., Aragon, T., Arppe, A., . . . Zeileis, A.  
543 (2020). DescTools: tools for descriptive statistics. R package version 0.99. 34.
- 544 Stockton, D. G., Martini, X., Patt, J. M., & Stelinski, L. L. (2016). The influence of learning  
545 on host plant preference in a significant phytopathogen vector, *Diaphorina citri*.  
546 *PLOS ONE*, *11*(3), e0149815. doi: 10.1371/journal.pone.0149815
- 547 Su, Q., Preisser, E. L., Zhou, X. M., Xie, W., Liu, B. M., Wang, S. L., . . . Zhang, Y. J. (2015).  
548 Manipulation of host quality and defense by a plant virus improves performance of  
549 whitefly vectors. *Journal of Economic Entomology*, *108*(1), 11-19. doi:  
550 10.1093/jee/tou012 %J
- 551 Szczepaniec, A., & Finke, D. (2019). Plant-vector-pathogen interactions in the context of  
552 drought stress. [Mini Review]. *Frontiers in Ecology and Evolution*, *7*(262). doi:  
553 10.3389/fevo.2019.00262
- 554 Tzanetakis, I., Martin, R., & Wintermantel, W. (2013). Epidemiology of criniviruses: An  
555 emerging problem in world agriculture. [Review]. *frontiers in Microbiology*, *4*(119),  
556 119. doi: 10.3389/fmicb.2013.00119
- 557 Vaishampayan, S. M., Kogan, M., Waldbauer, G. P., & Woolley, J. T. (1975). Spectral  
558 specific responses in the visual behavior of the Greenhouse Whitefly, *Trialeurodes*  
559 *Vaporariorum* (Homoptera: Aleyrodidae). *Entomologia Experimentalis et Applicata*,  
560 *18*(3), 344-356. doi: 10.1111/j.1570-7458.1975.tb00407.x
- 561 Van Roermund, H. J. W., & van Lenteren, J. C. (1992). *The parasite-host relationship*  
562 *between Encarsia formosa* (Hymenoptera: Aphelinidae) and *Trialeurodes*  
563 *vaporariorum* (Homoptera: Aleyrodidae) XXXIV. Life-history parameters of the

- 564 *greenhouse whitefly, Trialeurodes vaporariorum as a function of host plant and*  
565 *temperature* (Vol. 92-3). Wageningen, Netherlands: Wageningen Agricultural  
566 University Papers.
- 567 Vargas, A. (2010). *Respuesta de la Colección Central Colombiana de Solanum tuberosum*  
568 *de la Universidad Nacional de Colombia a la infección con Potato yellow vein virus*  
569 *(PYVV)*. M.Sc, Universidad Nacional de Colombia, Bogotá, Colombia.
- 570 Whitfield, A. E., Falk, B. W., & Rotenberg, D. (2015). Insect vector-mediated transmission  
571 of plant viruses. *Virology*, 479-480, 278-289. doi: 10.1016/j.virol.2015.03.026
- 572 Wright, S. P. (1992). Adjusted P-Values for simultaneous inference. *Biometrics*, 48(4), 1005-  
573 1013. doi: 10.2307/2532694
- 574 Wu, Y., Davis, T. S., & Eigenbrode, S. D. (2014). Aphid behavioral responses to virus-  
575 infected plants are similar despite divergent fitness effects. *Entomologia*  
576 *Experimentalis et Applicata*, 153(3), 246-255. doi: 10.1111/eea.12246
- 577
